# Supplementary material
Source: PubMed Central journal article supplement (PMC8325050)
Supplement: NIHMS1544996-supplement-supplementary.pdf [file NIHMS1544996-supplement-supplementary.pdf]

# Supplementary Materials

---

◆

**Infant Data:** Figs. 1, 2, 3 and 4 demonstrate that GFM consistently gives the best performance for all time points.

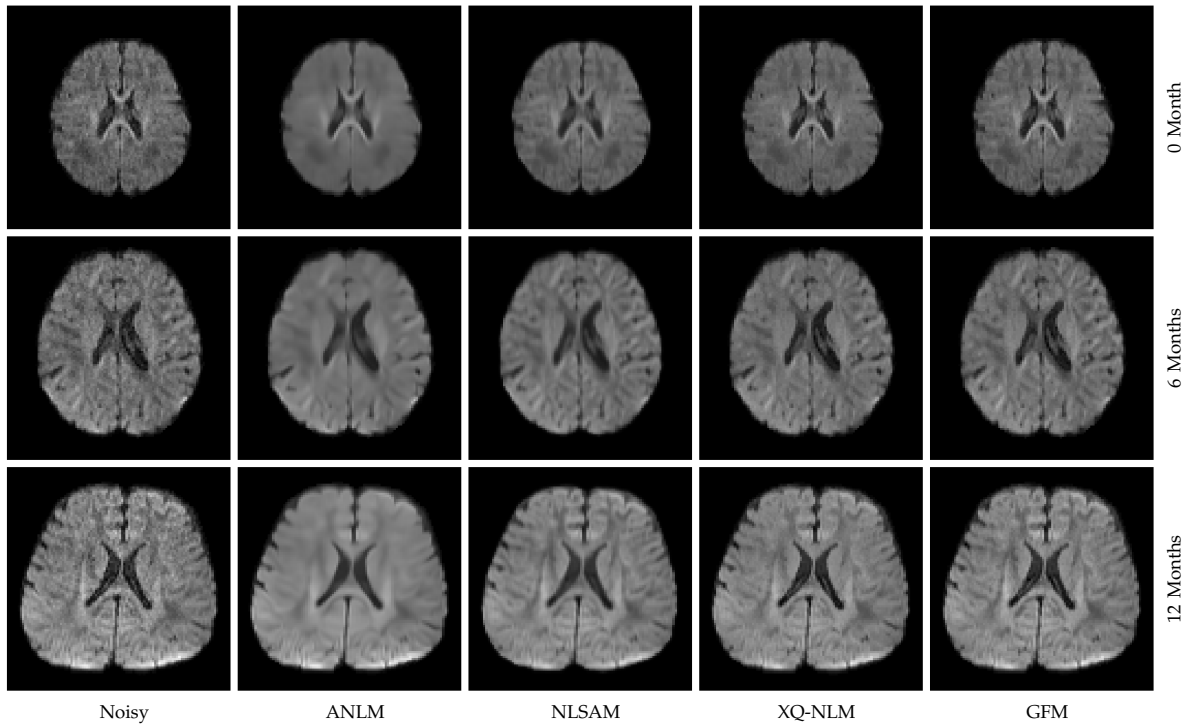

**Fig. 1: Infant DW Images.** Denoising of infant DW images.

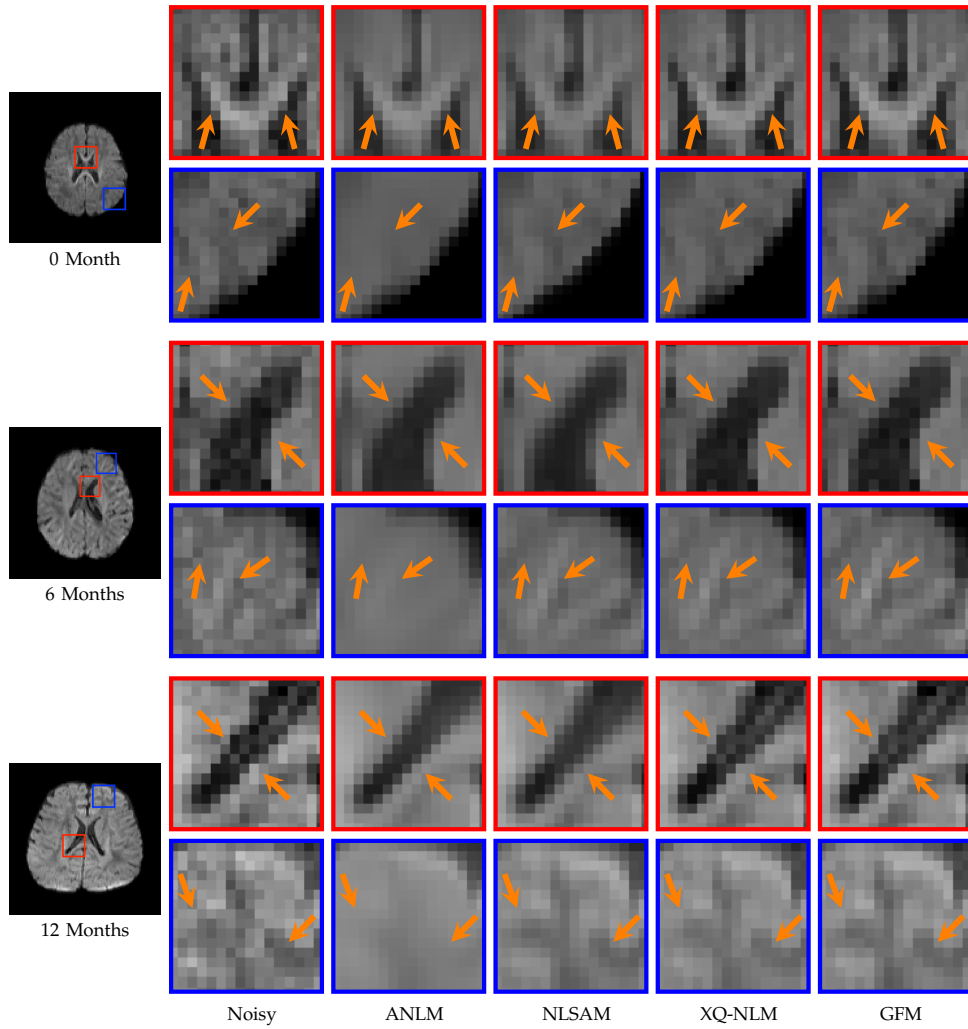

**Fig. 2: DW Images.** Edge preservation of various denoising algorithms.

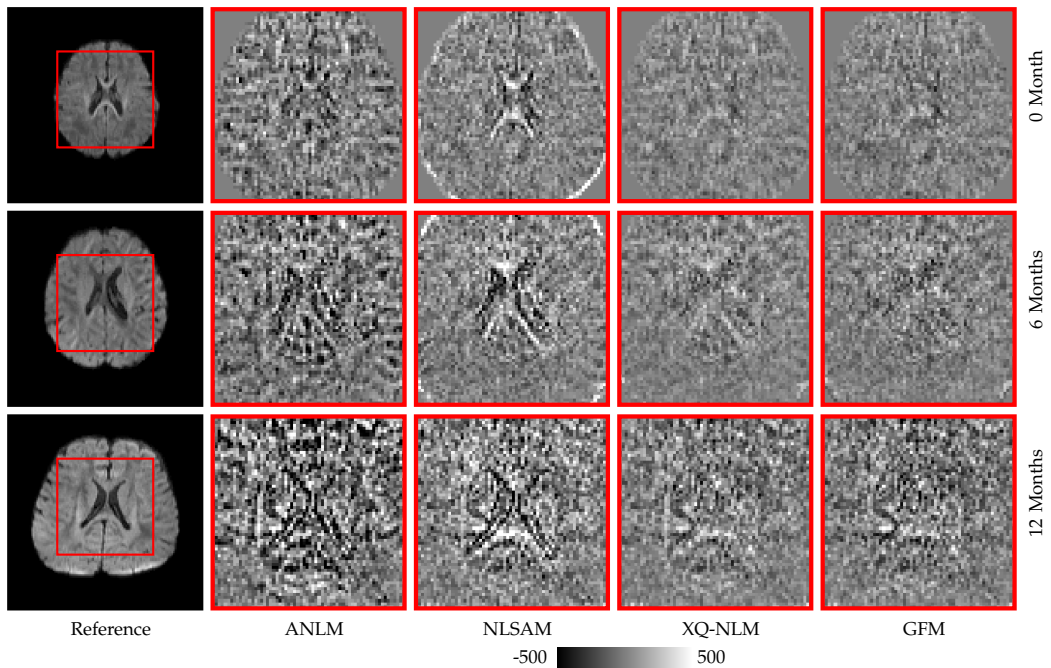

**Fig. 3: Residual Maps.** Evaluation of whether structural information is removed during denoising.

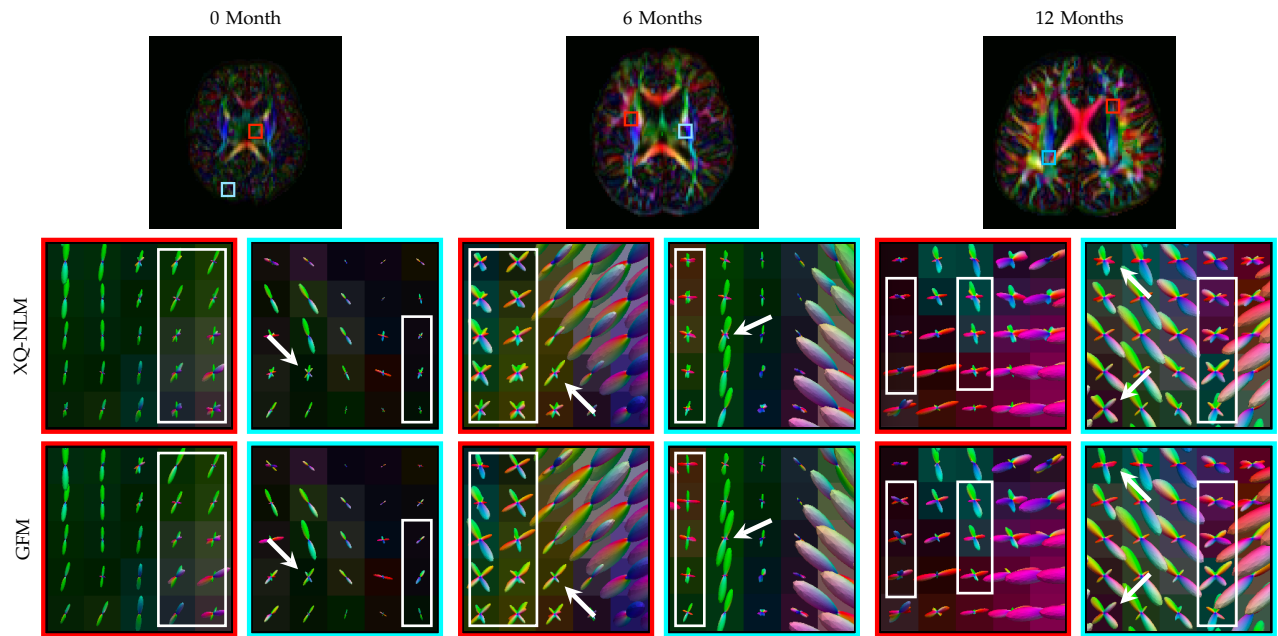

**Fig. 4: Fiber ODFs.** Comparison of white matter fiber ODFs given by XQ-NLM and GFM for different time points.
